# Supplementary material
Source: PubMed Central journal article supplement (PMC4848043)

**A** Correlation of H3K27ac profiles with chick st. 20 neural crest cells

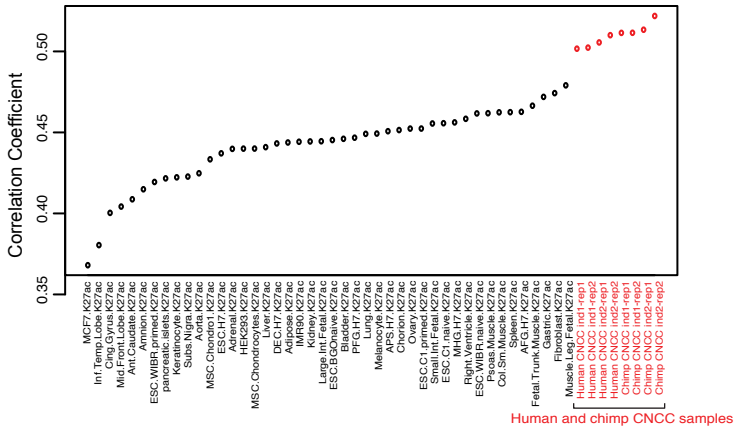

**B** Enrichment of neural crest-specific genes

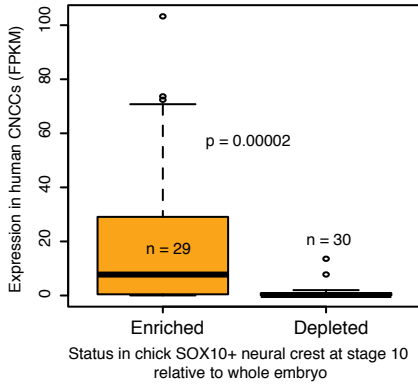

**C** Directed Differentiation to Neural Crest Lineages

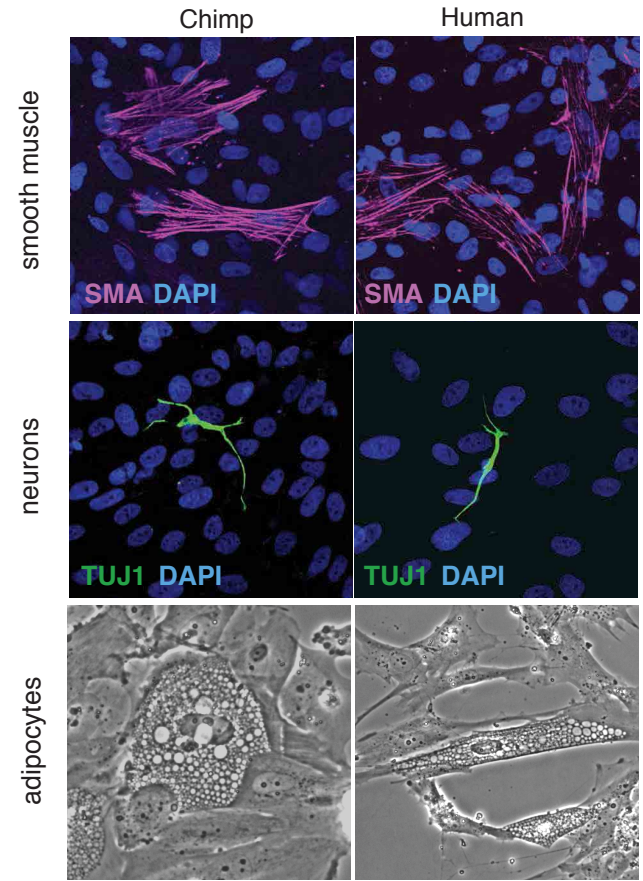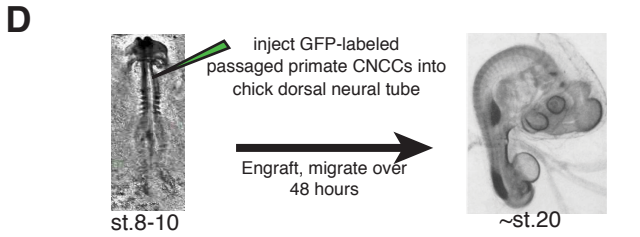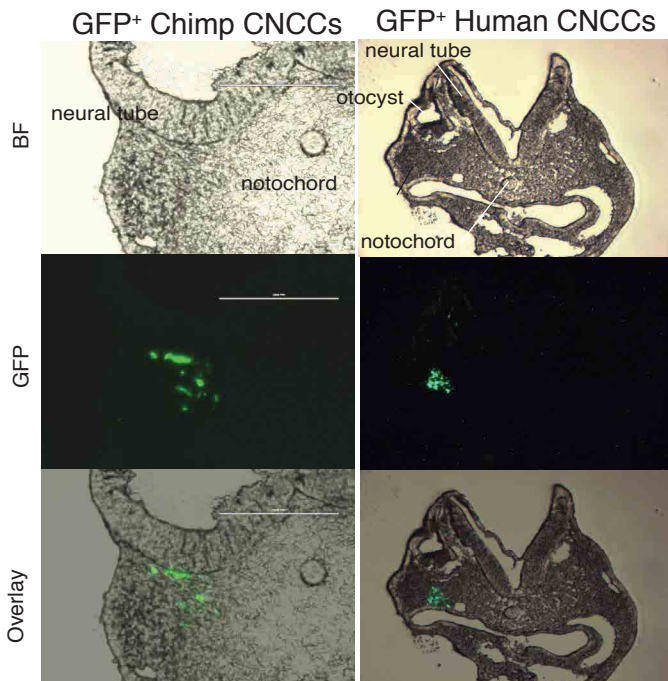

**E** GFP+ Human CNCCs GFP+ Chimp CNCCs

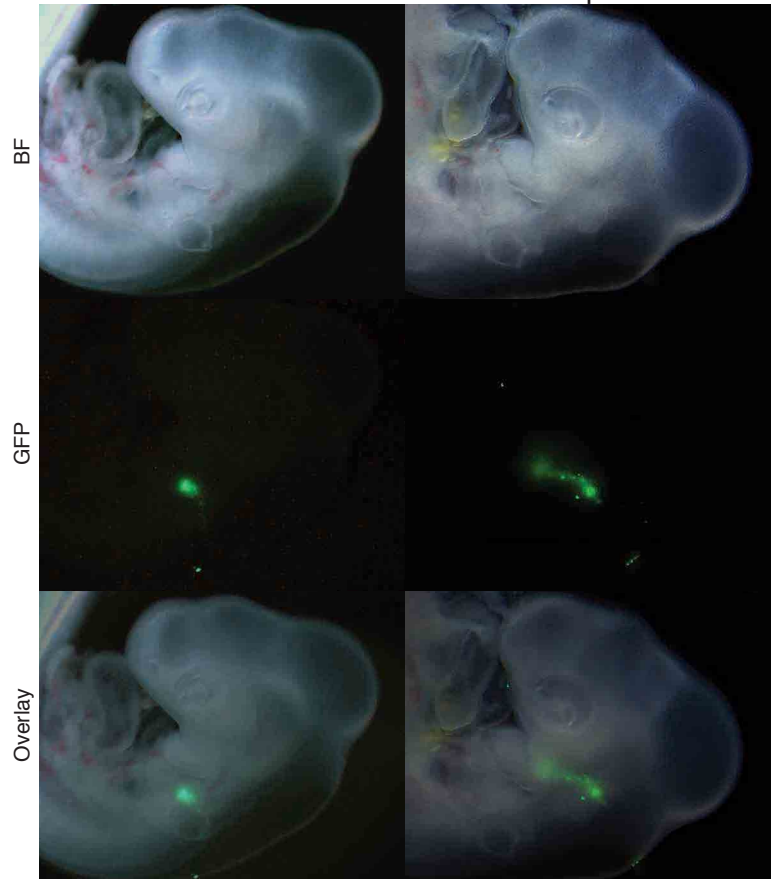

Supplement: NIHMS718619-supplement-2.pdf [file NIHMS718619-supplement-2.pdf]
