# Supplementary material
Source: PubMed Central journal article supplement (PMC4848043)

**A**

| Enhancer of Interest | Pronuclei Injected | Embryos | Survival | PCR+ | Transgenesis | LacZ+ | LacZ+ / PCR+ |
|----------------------|--------------------|---------|----------|------|--------------|-------|--------------|
| CNTNAP2x3-Human      | 187                | 58      | 31.02%   | 6    | 3.21%        | 5     | 83.33%       |
| CNTNAP2x3-Chimp      | 447                | 145     | 32.44%   | 11   | 2.46%        | 5     | 45.45%       |
| PAPPAx3-Human        | 363                | 139     | 38.29%   | 9    | 2.48%        | 7     | 77.78%       |
| PAPPAx3-Chimp        | 448                | 125     | 27.90%   | 19   | 4.24%        | 11    | 57.89%       |

**B**

**Additional chimp Tg embryos for Enhancer 1  
(near *CNTNAP2*)**

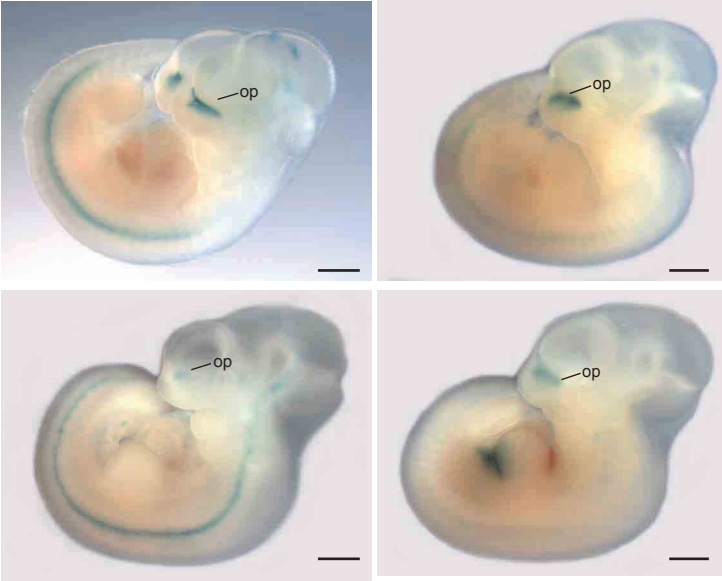

**Additional human Tg embryos for Enhancer 1  
(near *CNTNAP2*)**

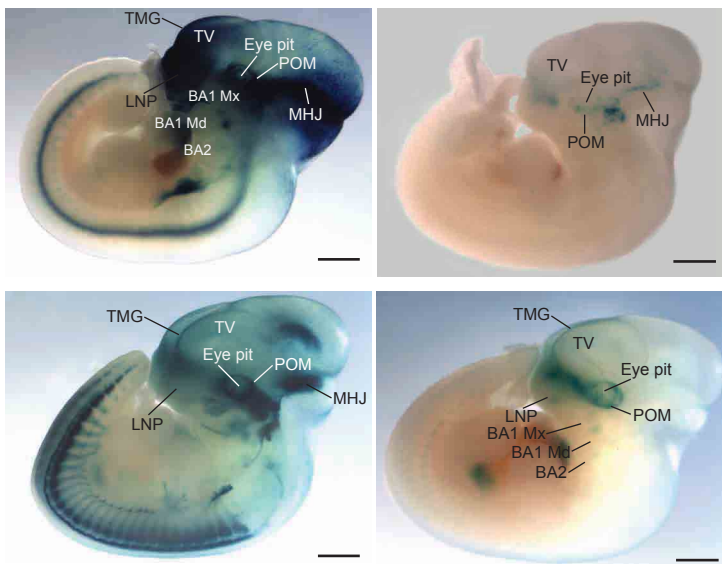**C**

**Additional chimp Tg embryos for Enhancer 2  
(near *PAPPA*)**

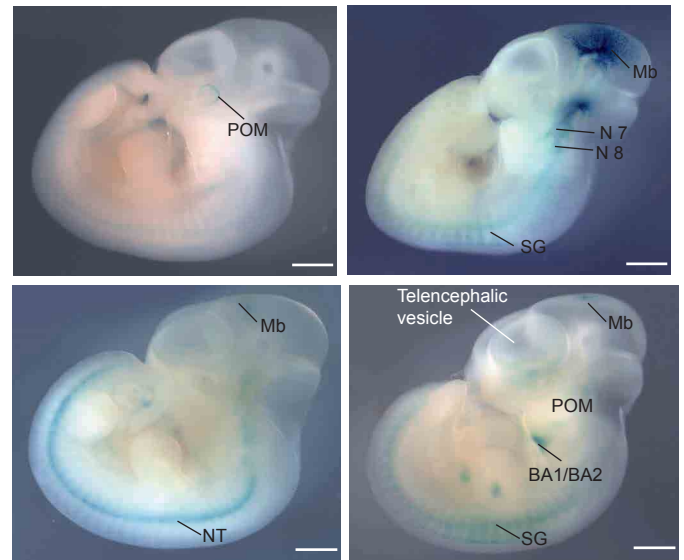

**Additional human Tg embryos for Enhancer 2  
(near *PAPPA*)**

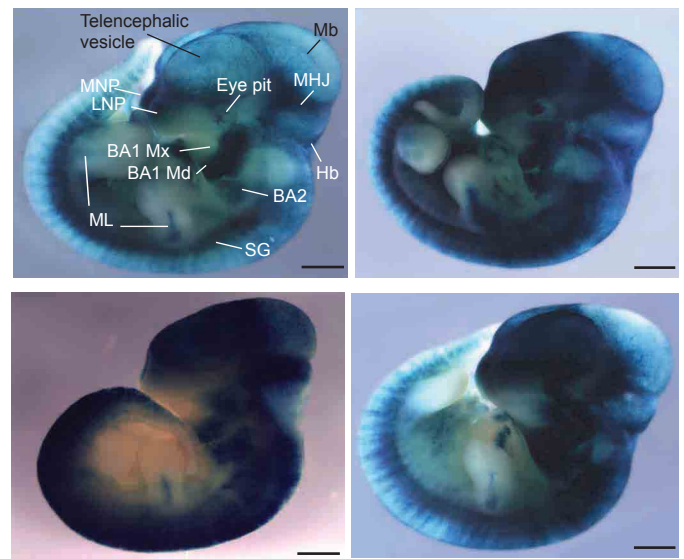

Supplement: NIHMS718619-supplement-5.pdf [file NIHMS718619-supplement-5.pdf]
