# Supplementary material
Source: PubMed Central journal article supplement (PMC4848043)

**A** Overlap Between HARs and CNCC Regulatory Elements

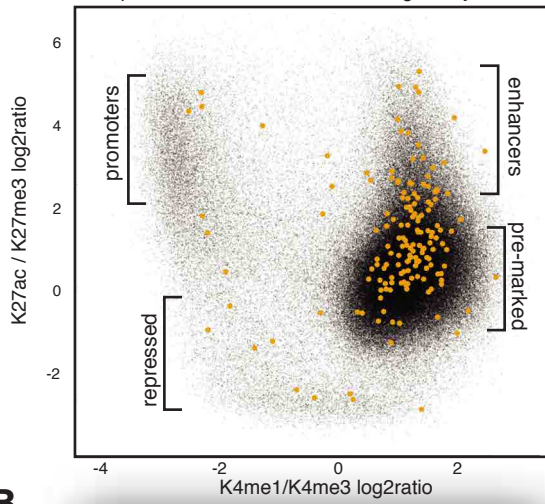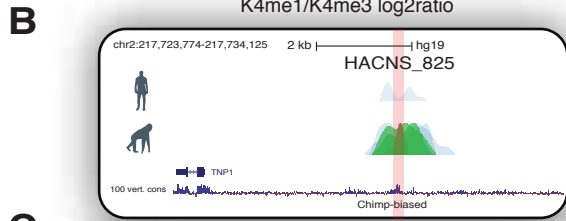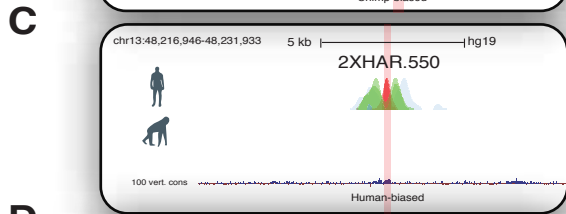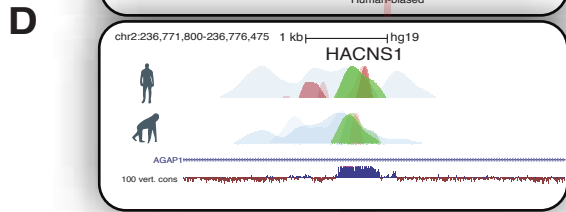

**G** Changes within Coordinator Motif Strength Relative to Ancestral State

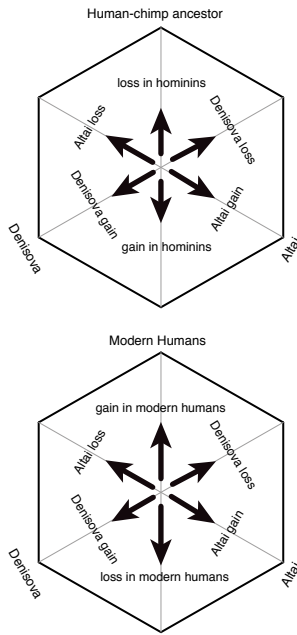

Coordinator Motif at Invariant-biased Enhancers

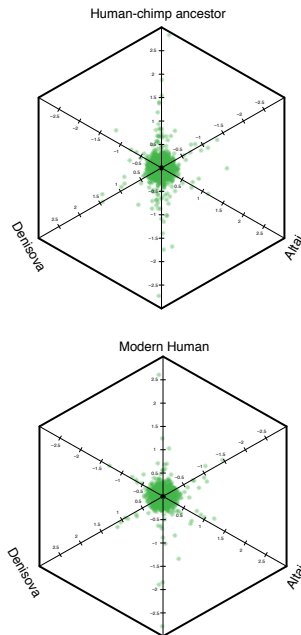

**E** Motif Turnover at Enhancers Tested In Vivo

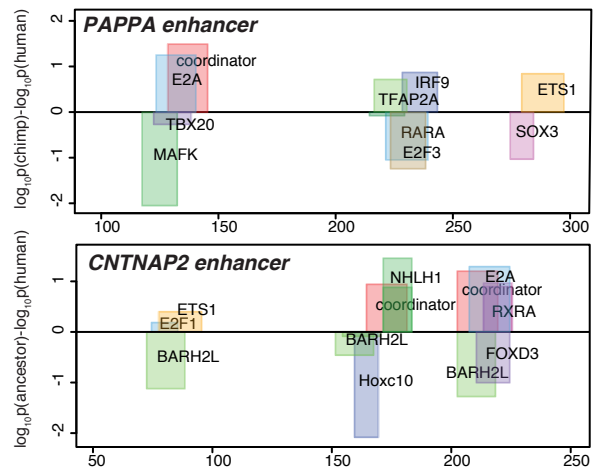

**F** Coordinator Motif Overlap at Element Classes

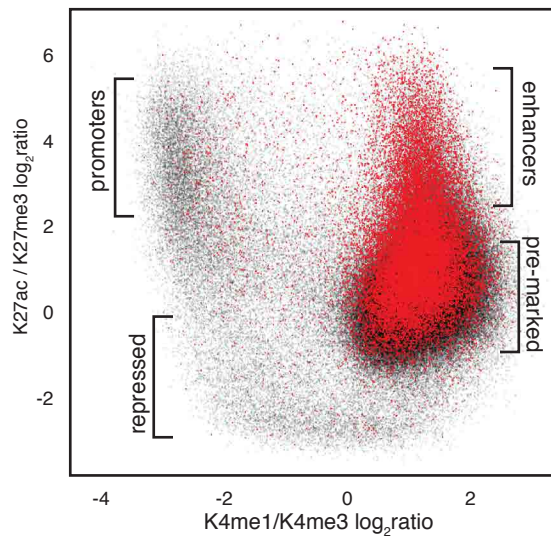

Changes within Coordinator Motif Strength Relative to Ancestral State



Coordinator Motif at Invariant-biased Enhancers



Coordinator Motif at Human-biased Enhancers

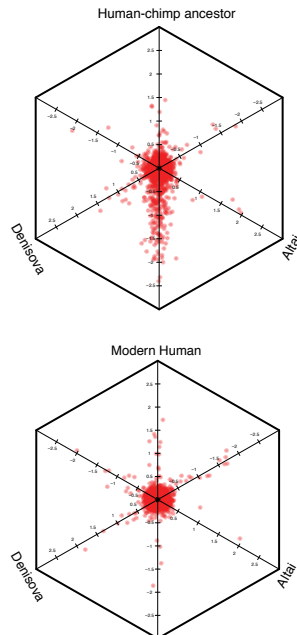

Coordinator Motif at Chimp-biased Enhancers

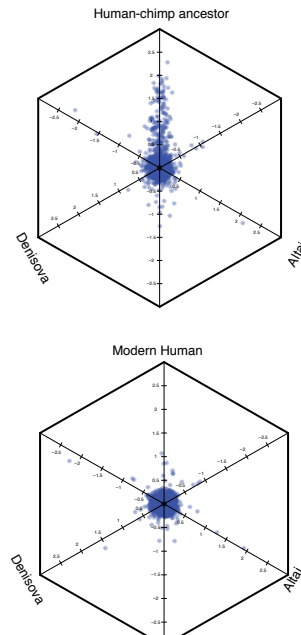

Supplement: NIHMS718619-supplement-6.pdf [file NIHMS718619-supplement-6.pdf]
