# Supplementary material
Source: PubMed Central journal article supplement (PMC4848043)

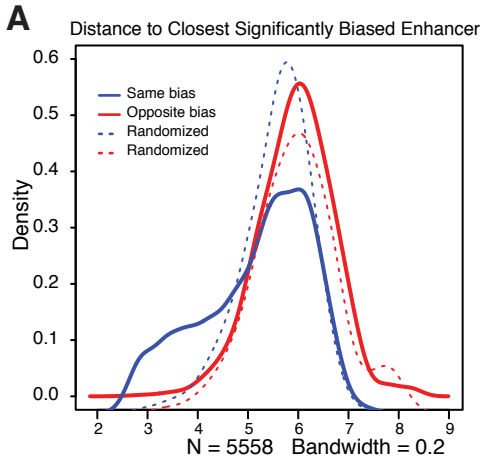

**B** Equation for Divergence Score

$$\frac{\sum_{i=-8}^{+8} -\log_{10}(\text{p-value of bias})_i}{\left(\text{position of enhancer}_{+8}\right) - \left(\text{position of enhancer}_{-8}\right)}$$

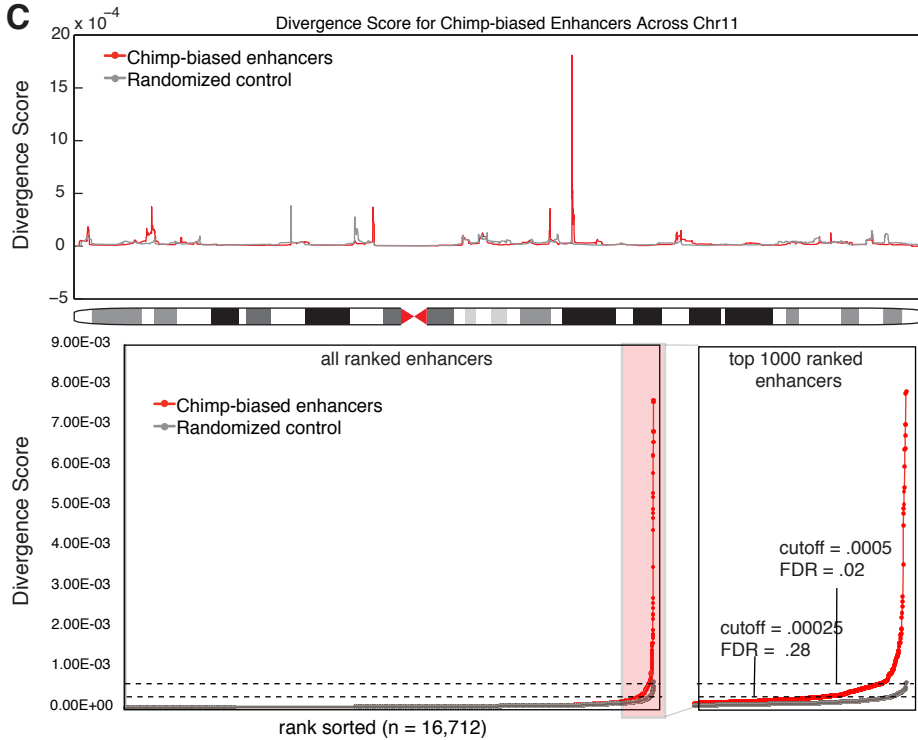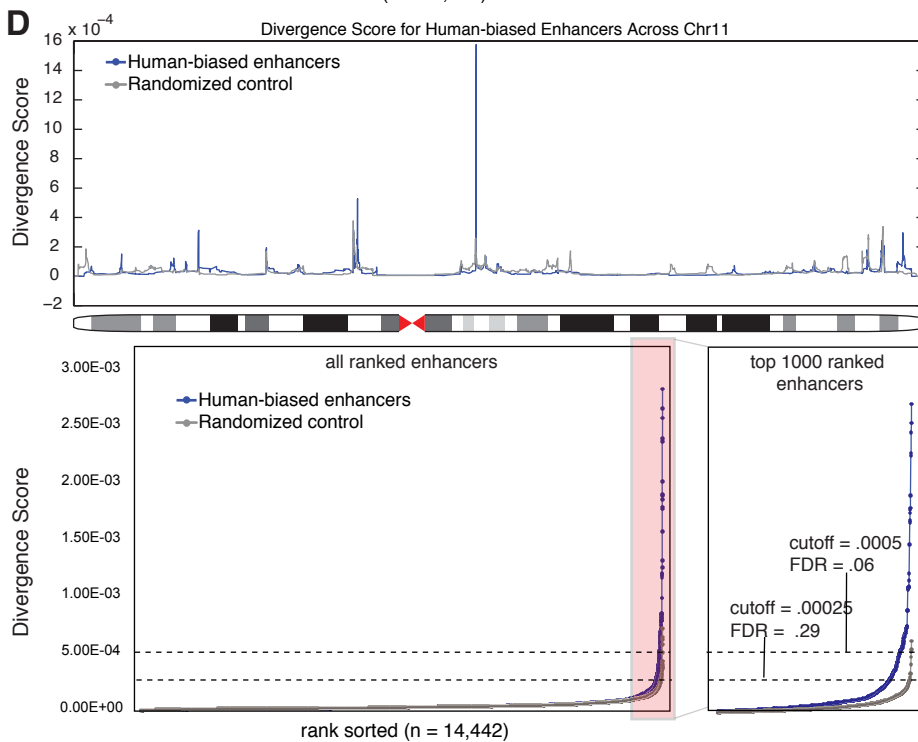

Supplement: NIHMS718619-supplement-7.pdf [file NIHMS718619-supplement-7.pdf]
