# Supplementary material
Source: PubMed Central journal article supplement (PMC4848043)

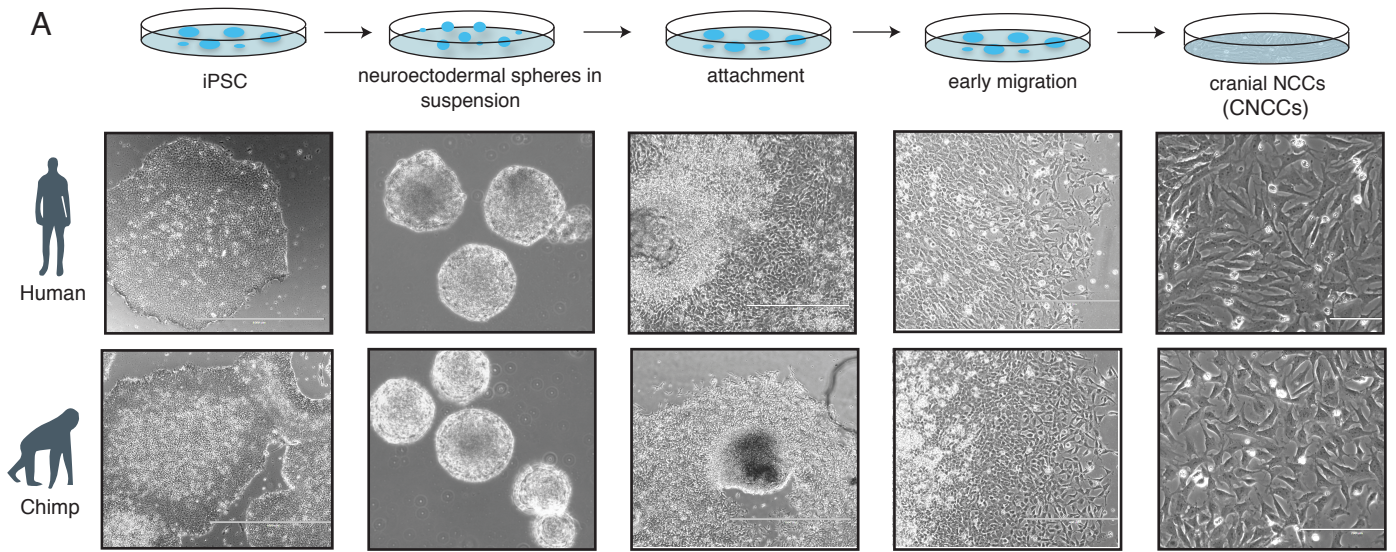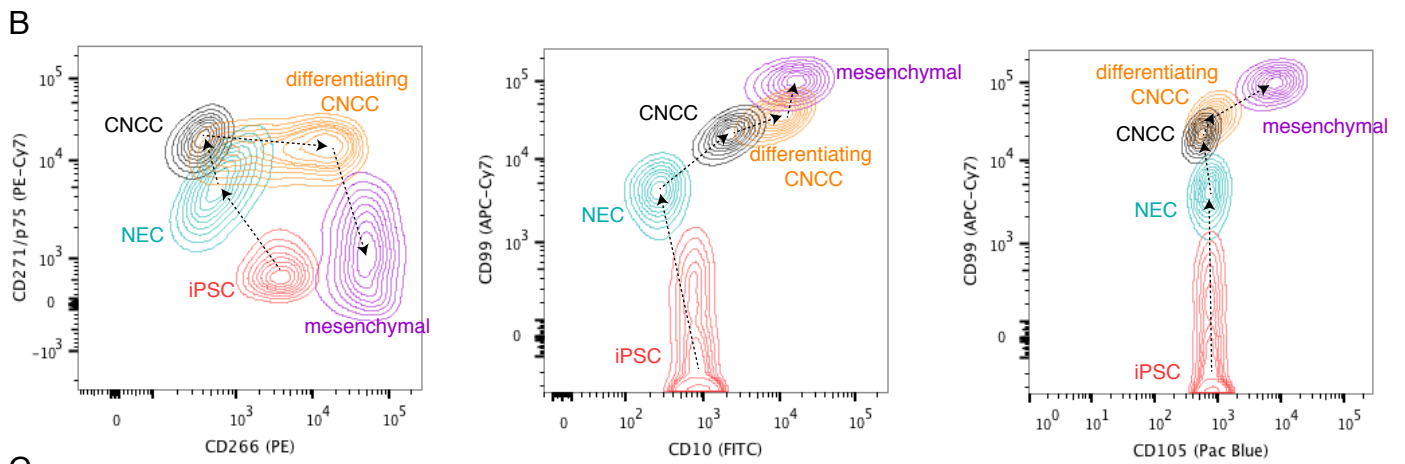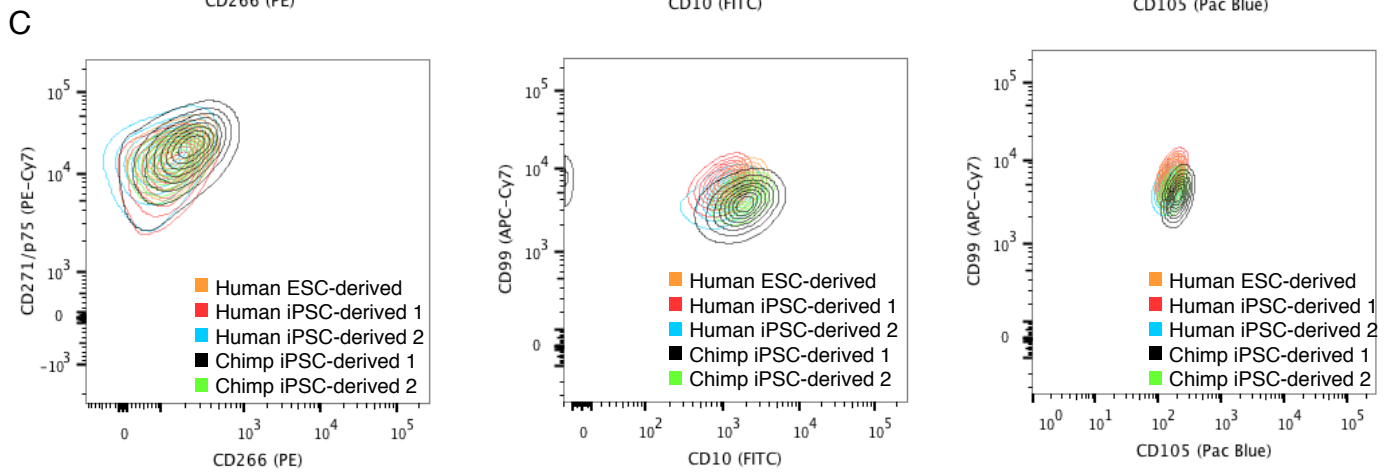

Supplement: NIHMS718619-supplement-1.pdf [file NIHMS718619-supplement-1.pdf]

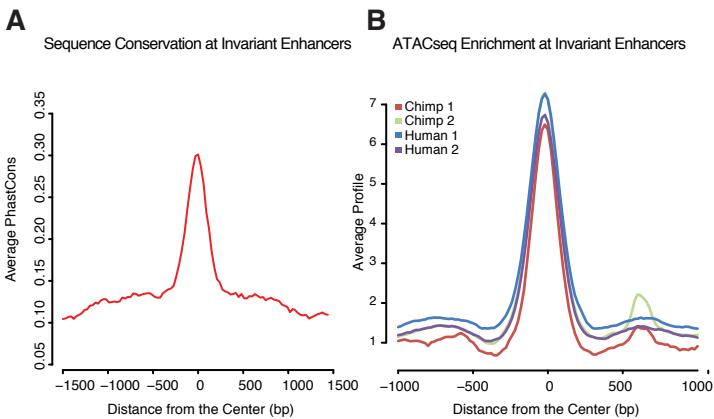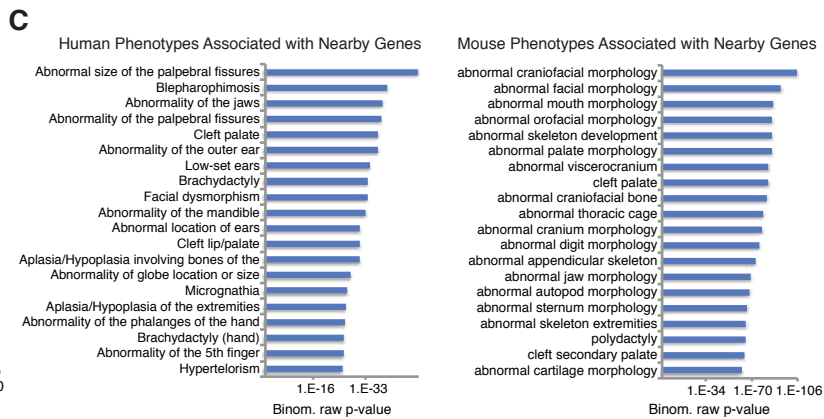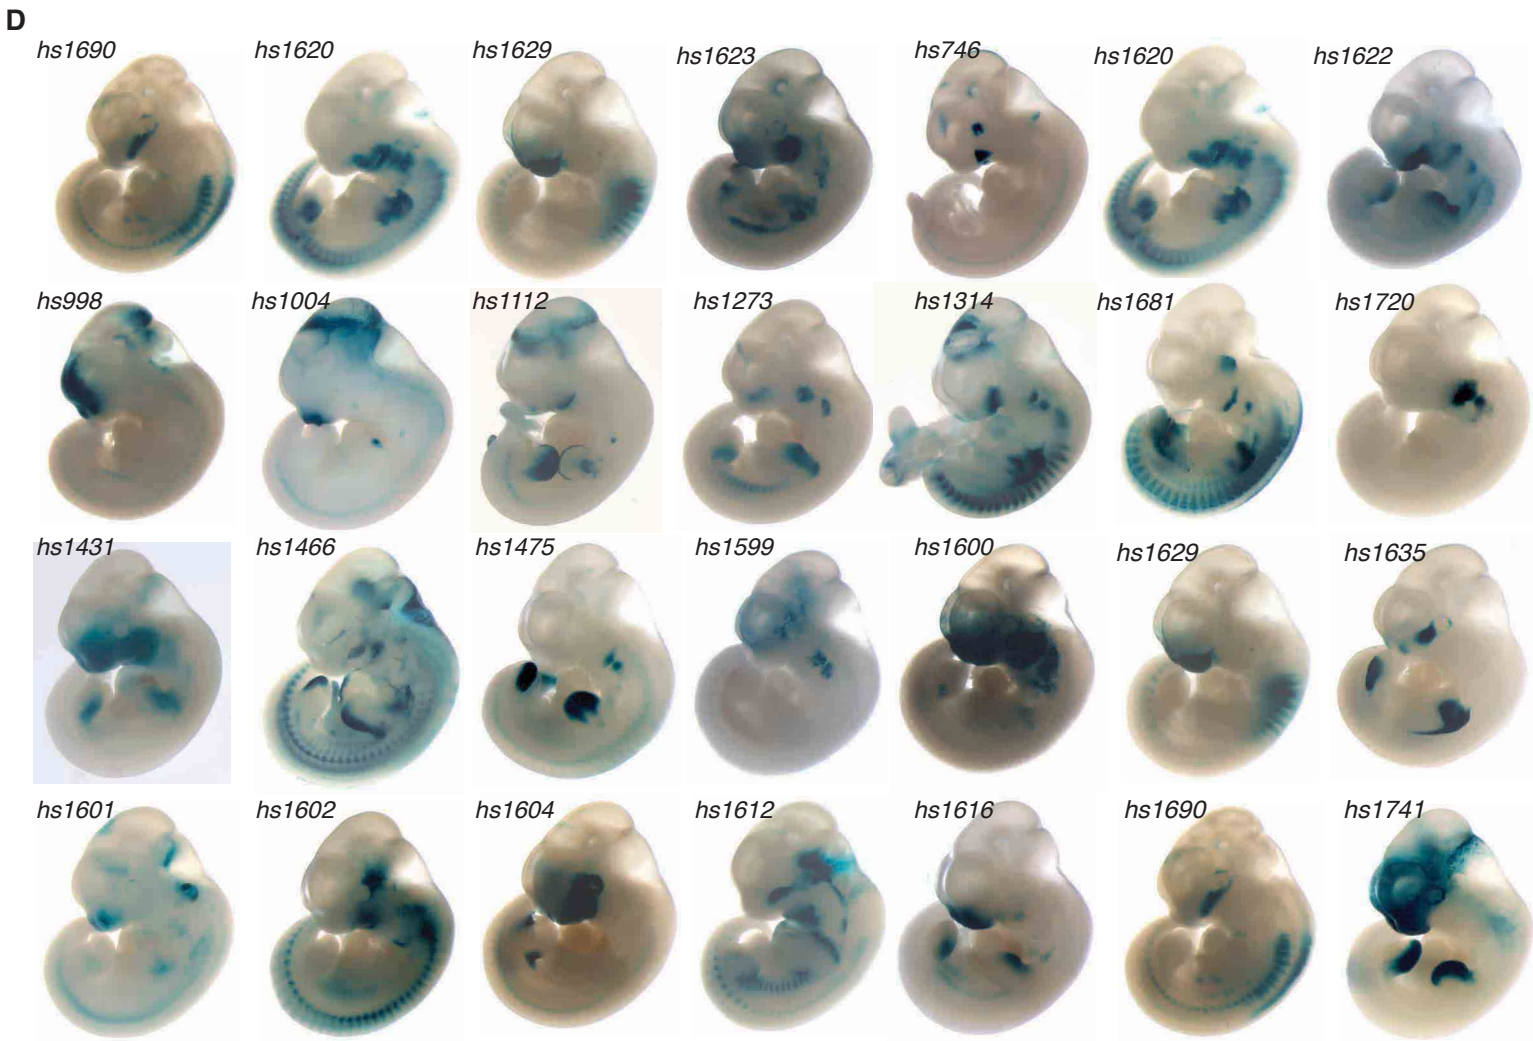

Supplement: NIHMS718619-supplement-3.pdf [file NIHMS718619-supplement-3.pdf]
